# Supplementary material for: Actinobacillus pleuropneumoniae Eradication with Enrofloxacin May Lead to Dissemination and Long-Term Persistence of Quinolone Resistant Escherichia coli in Pig Herds
Source: MDPI journal article supplement (doi:10.3390/antibiotics9120910), 2020-12-15
Supplement: s1 [file s1]

# Supplementary Materials

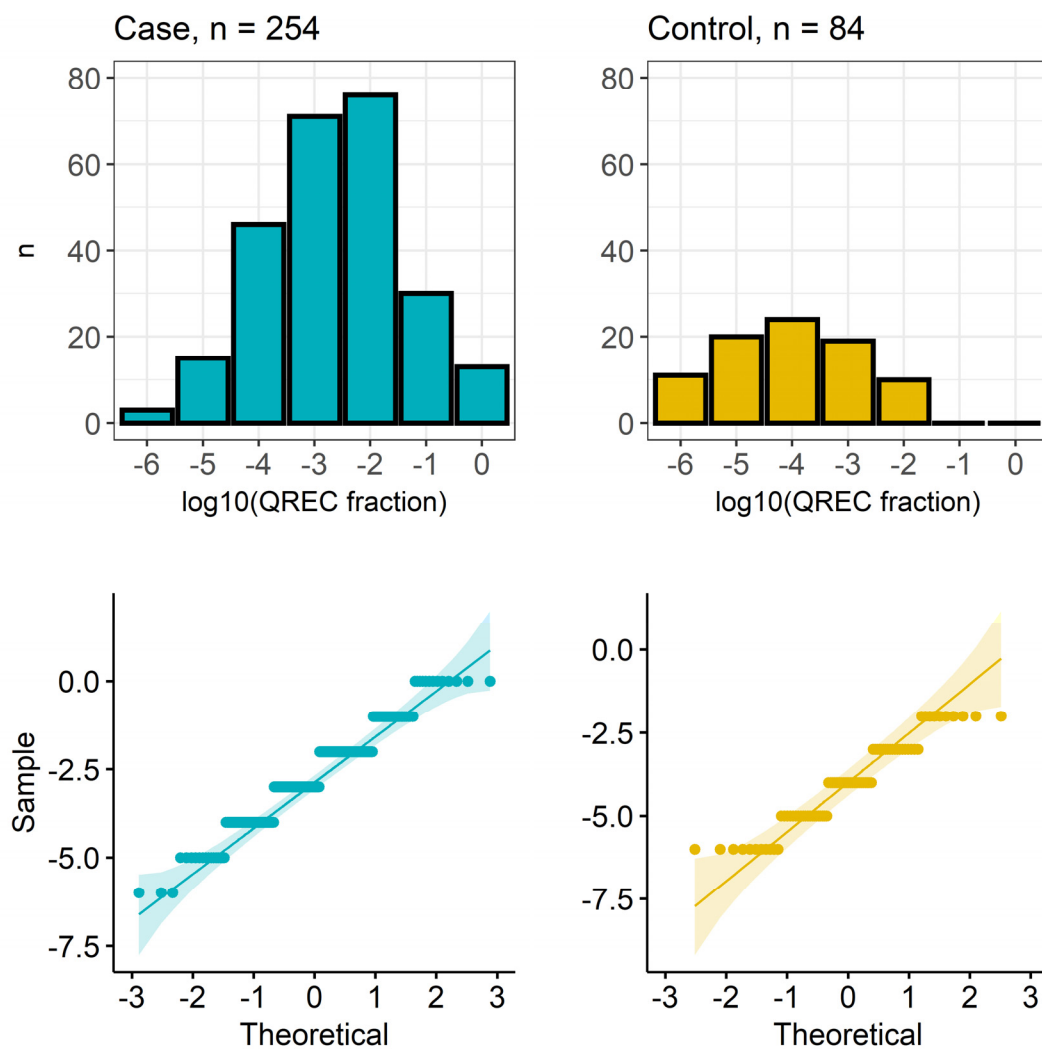

**Figure S1.** Distribution of the log10-transformed fractions of quinolone resistant *E. coli* (QREC) isolates in the case (blue) and control (yellow) herds, showing a normal distribution.

**Table S1.** X<sup>2</sup>-tests for all four age groups, case versus control.

| Age group     | Number of samples |          |          | X <sup>2</sup> -value | p-value    |
|---------------|-------------------|----------|----------|-----------------------|------------|
|               | Type              | Positive | Negative |                       |            |
| Weaner        | Case              | 72       | 28       | 103.96                | $p < 0.01$ |
|               | Control           | 3        | 100      |                       |            |
| Fattening pig | Case              | 25       | 35       | 21.068                | $p < 0.01$ |
|               | Control           | 7        | 73       |                       |            |
| Gilt          | Case              | 81       | 20       | 49.121                | $p < 0.01$ |
|               | Control           | 26       | 62       |                       |            |
| Sow           | Case              | 76       | 26       | 13.259                | $p < 0.01$ |
|               | Control           | 48       | 49       |                       |            |

**Table S2.** Resistance patterns among the 130 quinolone resistant *E. coli* isolates with additional resistances in addition to ciprofloxacin and/or nalidixic acid. AMP = ampicillin, CAZ = ceftazidime, CHL = chloramphenicol, CTX = cefotaxime, GEN = gentamicin, SMX = sulfamethoxazole, TET = tetracycline, TGC = tigecycline, TMP = trimethoprim.

| Antimicrobial                | Number of isolates | Number of resistances |
|------------------------------|--------------------|-----------------------|
| TET                          | 62                 | 1                     |
| SMX, TET                     | 36                 | 2                     |
| SMX, TMP, AMP                | 10                 | 3                     |
| SMX, TMP, TET, CHL, AMP, GEN | 6                  | 6                     |
| GEN                          | 4                  | 1                     |
| SMX, AMP                     | 3                  | 2                     |
| SMX, TET, CHL, AMP, GEN      | 2                  | 5                     |
| TGC                          | 2                  | 1                     |
| AMP                          | 1                  | 1                     |
| SMX                          | 1                  | 1                     |
| SMX, CAZ, CTX,               | 1                  | 3                     |
| SMX, TET, AMP, GEN           | 1                  | 4                     |
| TET, TGC                     | 1                  | 2                     |

**Table S3.** Overview of the relative amount of bacteria detected if growth at the respective dilution. The numbers were used for both QREC and total *E. coli*.

| Dilution          | No. of bacteria |
|-------------------|-----------------|
| Overnight culture | 10 <sup>3</sup> |
| 10 <sup>-1</sup>  | 10 <sup>4</sup> |
| 10 <sup>-2</sup>  | 10 <sup>5</sup> |
| 10 <sup>-3</sup>  | 10 <sup>6</sup> |
| 10 <sup>-4</sup>  | 10 <sup>7</sup> |
| 10 <sup>-5</sup>  | 10 <sup>8</sup> |
| 10 <sup>-6</sup>  | 10 <sup>9</sup> |

**Publisher's Note:** MDPI stays neutral with regard to jurisdictional claims in published maps and institutional affiliations.

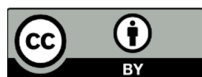

© 2020 by the authors. Licensee MDPI, Basel, Switzerland. This article is an open access article distributed under the terms and conditions of the Creative Commons Attribution (CC BY) license (<http://creativecommons.org/licenses/by/4.0/>).
